# Supplementary material for: Mathematical Modeling and Transcriptome Profiling of Breast Cancer Cells During Tamoxifen Treatment Reveal Multiple Trajectories for Resistant Subtypes
Source: Research Square preprint supplement (doi:10.21203/rs.3.rs-136924/v1), 2021-01-13
Supplement: Supplementary file 2 [file ced7145931754b03fbe0d1f5.xlsx]

## Sheet: Species
Figure S1 Initial conditions and equation of cell fate decisions in the model
Subpopulation of cells
Symbol	Discription	Initial condition (cells)
Xs	sensitive cells	100
Xp	pre-resistant cells	0
Xr1	resistant cells #1	0
Xr2	resistant cells #2	0
Input
Symbol	Discription	Initial condition
Tam	Tamoxifen	0 or 1 uM
Tam_integ	Cumulative concentration of tamoxifen	0 uM * week

## Sheet: Equations
Figure S1 Initial conditions and equation of cell fate decisions in the model
Rate Equations
ID	Mathematical representations	Description
v1	v1_k * (1 - v1_i * Tam) * Xs	Cell division of Xs
v2	v2_c * Tam * Xs / (1 + exp(-(v2_a * Tam_integ - v2_b)))	transition from Xs to Xp
v3	v3_c * Xp	transition from Xp to Xs
v4	v4_k * Tam * Xs	Cell death of Xs caused by tamoxifen
v5	v5_k * Xp	Cell division of Xp
v6	v6_k * Tam *Xp	Cell death of Xp caused by tamoxifen
v7	v7_c * Tam * Xp / (1 + exp(-(v7_a * Tam_integ - v7_b)))	transition from Xp to Xr1
v8	v8_c * Xr1	transition from Xr1 to Xp
v9	v9_k * Xr1	Cell division of Xr1
v10	v10_c * Tam * Xp / (1 + exp(-(v10_a * Tam_integ - v10_b)))	transition from Xp to Xr2
v11	v11_c * Xr2	transition from Xr2 to Xp
v12	v12_k * Xr2	Cell division of Xr2
v13	Tam	Cumulative concentration of tamoxifen
Differential Equations
left side d[symbol]/dt	right side
Xs	v1 - v2 + v3 - v4
Xp	v2 + v5 - v3 - v6 - v7 + v8 - v10 + v11
Xr1	v7 - v8 + v9
Xr2	v10 - v11 + v12
Tam	0
Tam_integ	v13

## Sheet: Parameters
Figure S1 Initial conditions and equation of cell fate decisions in the model
Parameters
ID	Unit	Parameter values
		#1	#2	#3	#4	#5	#6	#7	#8	#9	#10	#11	#12	#13	#14	#15	#16	#17	#18	#19	#20
v1_k	week-1	1.19531	1.20863	1.20099	1.20755	1.18617	1.20159	1.20069	1.20843	1.20699	1.19926	1.20246	1.19891	1.18917	1.19986	1.19141	1.20482	1.19079	1.18874	1.18611	1.20475
v1_i	uM-1	0.10355	0.274812	0.0676652	0.0358806	0.0885649	0.0575234	0.0852604	0.0306223	0.0285752	0.084723	0.0821474	0.072912	0.0480315	0.070742	0.038608	0.125359	0.0279721	0.159764	0.0536986	0.223395
v2_a	uM-1	4.99357	3.63458	4.39783	3.42608	3.30032	3.42334	3.71647	4.44818	2.327	4.21168	2.67814	2.39858	3.65608	4.21682	3.98256	2.87943	4.31912	4.20638	3.9198	3.95744
v2_b	week	2.21252	2.06252	1.90831	2.18341	2.25468	2.23889	2.30326	2.08014	2.5893	2.1487	2.47266	2.5453	1.73519	2.24302	2.11059	2.42196	1.96845	2.04289	2.06309	1.84804
v2_c	uM-1week-1	99.9815	25.6695	31.2146	24.9181	100	49.4076	63.6132	59.3	30.8982	26.1354	40.311	76.7657	13.7326	74.2816	23.2252	40.5742	59.2924	61.2587	65.5877	14.6152
v3_c	week-1	2.72888	0.577251	0.720611	0.49177	1.66642	1.15269	1.47982	1.38573	0.402112	0.129294	0.642417	1.27033	0.116742	1.89262	0.356429	1.11649	1.23827	1.72525	1.76313	0.341127
v4_k	uM-1week-1	0.710862	1.2443	0.586733	0.0775825	1.10546	0.615523	0.386992	0.615437	0.0882461	0.169577	1.59687	0.486095	0.836427	1.23133	0.0924873	0.966259	1.65416	0.919227	0.302358	0.41937
v5_k	week-1	0.192124	0.144415	0.254982	0.323043	0.100446	0.277178	0.132895	0.400613	0.235047	0.32798	0.255505	0.180617	0.164623	0.336266	0.221876	0.197838	0.395364	0.10355	0.30856	0.236933
v6_k	uM-1week-1	0.293519	0.143358	0.274088	0.38953	0.0658229	0.319513	0.274794	0.385431	0.287852	0.343146	0.240305	0.120736	0.158655	0.365571	0.247026	0.284642	0.302447	0.120244	0.249011	0.190851
v7_a	uM-1	0.857389	0.740271	0.642082	0.765712	0.67887	0.738323	0.72626	0.820544	0.616742	0.43011	0.60413	0.689461	0.53149	0.753531	0.215588	0.642128	0.945671	0.771688	0.824938	0.873212
v7_b	week	6.99251	8.17161	7.0146	7.80025	10	8.81483	8.02703	7.74239	9.12409	5.17627	6.15904	8.94353	6.72904	8.41785	9.31267	10	7.30456	7.50473	7.89069	7.77854
v7_c	uM-1week-1	10.1085	13.5388	0.466338	3.33032	60.6641	18.665	4.68728	2.91797	2.51677	0.100364	0.180491	20.2701	0.17804	23.5193	0.152553	7.23403	5.18585	1.52539	20.701	15.8322
v8_c	week-1	6.33105	5.88401	0.548815	1.727	10	5.8056	2.211	1.79339	0.467958	0.405239	0.234257	5.85872	0.149559	8.21877	0.104684	1.97991	2.4276	1.36517	8.41277	6.59172
v9_k	week-1	0.415847	0.740604	0.817397	0.747233	0.460851	0.997674	0.775686	1.10708	0.236439	0.909157	0.720736	0.22322	0.636292	0.47932	0.555271	1.3	0.458967	1.18823	0.187853	0.557665
v10_a	uM-1	0.817011	0.802001	1.01111	1.02252	0.926724	1.65709	1.11457	1.11934	0.931385	0.921793	1.06895	1.03093	0.940949	1.53722	0.98195	1.50095	1.06408	1.03317	1.6949	2.30452
v10_b	week	9.99931	9.87648	8.7782	8.27733	10	7.30805	8.0268	8.32623	8.85807	9.08024	8.03217	8.74641	6.57086	7.35323	8.49402	7.31009	8.41496	8.68027	5.30831	7.01427
v10_c	uM-1week-1	61.5561	45.812	4.16452	1.90144	78.9193	5.61153	3.95572	9.83517	8.95248	15.5713	1.17494	12.5774	0.113751	9.74682	5.33361	4.99749	9.0507	9.70909	0.107268	24.7969
v11_c	week-1	8.3577	6.98397	0.793013	0.664488	7.59998	2.0363	1.54488	2.52195	2.54163	3.29111	0.446262	3.12865	0.107533	4.44698	1.62346	1.89427	2.64333	1.77795	0.336618	8.6195
v12_k	week-1	1.3	1.01456	0.791034	0.997681	1.11069	0.803157	1.10463	0.656231	1.27382	0.901005	1.00117	1.22147	0.972359	1.15759	0.968727	0.465488	1.06228	0.273329	1.13341	0.827819
